# Supplementary material
Source: Springer Nature journal article supplement (https://www.springermedizin.de/resource/supplementary/12957_2010_786_MOESM3_ESM.pdf/9565872)

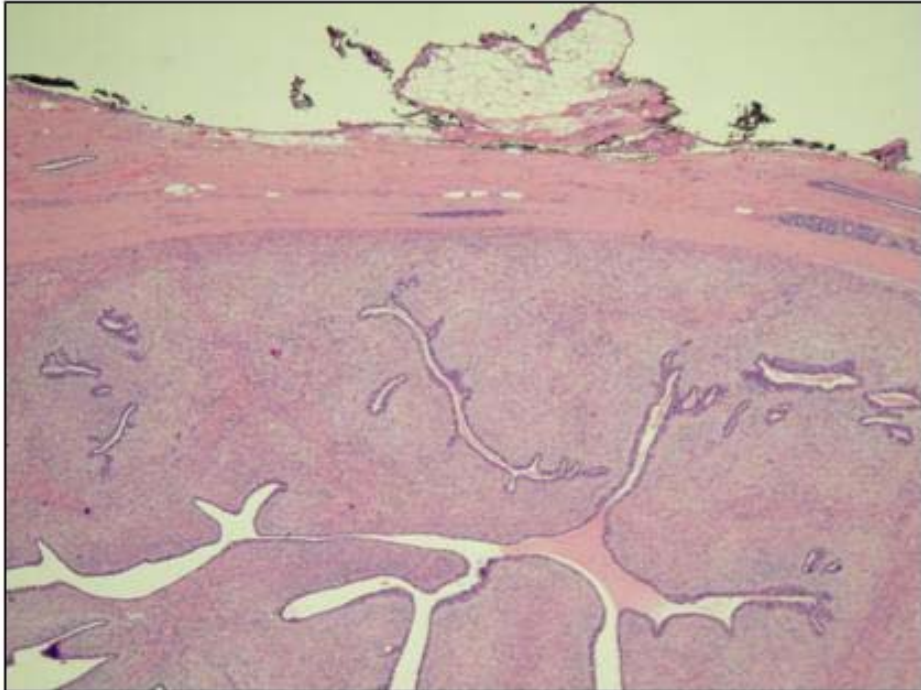

Supplement: MOESM3 [file 9565872]
